# Supplementary material for: Catastrophic chromosomal restructuring during genome elimination in plants
Source: eLife. 2015 May 15;4:e06516. doi: 10.7554/eLife.06516 (PMC4461816; doi:10.7554/eLife.06516)
Supplement: Supplementary file 1. — List of the aneuploid individuals from GFP-tailswap × Ler gl1-1 crosses used in this study. Unique identifiers (FRAG IDs) are listed for each individual, along with the GFP-tailswap parental lines as well as their corresponding aneuploid chromosome types. The final 16 columns indicate whether individuals exhibited the numerical, truncated or shattered aneuploid chromosome type, and which specific chromosomes displayed these features. DOI: http://dx.doi.org/10.7554/eLife.06516.020 [file elife-06516-supp1.xls]

## Sheet: Sheet1
FRAG_ID	PLANT_ID	HI_Line	Chr1	Chr2	Chr3	Chr4	Chr5	Numerical	Num Chr #1	Num Chr #2	Num Chr #3	Num Chr #4	Truncated	Trc Chr #1	Trc Chr #2	Shattered	Shtr Chr #1	Shtr Chr #2
FRAG00026	PL00026	GFPtswap_11	normal	plus	normal	normal	normal	No	.	.	.	.	No	.	.	Yes	Chr2	.
FRAG00027	PL00027	GFPtswap_11	plus	normal	plus	normal	normal	Yes	Chr1	Chr3	.	.	No	.	.	No	.	.
FRAG00028	PL00028	GFPtswap_11	plus	normal	plus	normal	plus	Yes	Chr3	.	.	.	Yes	Chr5	.	Yes	Chr1	.
FRAG00029	PL00029	GFPtswap_11	normal	normal	normal	normal	plus	Yes	Chr5	.	.	.	No	.	.	No	.	.
FRAG00030	PL00030	GFPtswap_11	plus	normal	normal	normal	normal	No	.	.	.	.	No	.	.	Yes	Chr1	.
FRAG00031	PL00031	GFPtswap_11	normal	normal	normal	plus	normal	Yes	Chr4	.	.	.	No	.	.	No	.	.
FRAG00032	PL00032	GFPtswap_11	normal	plus	normal	normal	normal	Yes	Chr2	.	.	.	No	.	.	No	.	.
FRAG00034	PL00034	GFPtswap_11	normal	normal	normal	plus	plus	No	.	.	.	.	Yes	Chr4	Chr5	No	.	.
FRAG00047	PL00047	GFPtswap_11	normal	plus	normal	normal	normal	No	.	.	.	.	Yes	Chr2	.	No	.	.
FRAG00048	PL00048	GFPtswap_11	normal	plus	normal	normal	normal	Yes	Chr2	.	.	.	No	.	.	No	.	.
FRAG00050	PL00050	GFPtswap_11	plus	plus	normal	plus	normal	Yes	Chr2	.	.	.	No	.	.	Yes	Chr1	Chr4
FRAG00051	PL00051	GFPtswap_11	normal	normal	plus	normal	normal	Yes	Chr3	.	.	.	No	.	.	No	.	.
FRAG00054	PL00054	GFPtswap_11	normal	plus	normal	normal	normal	Yes	Chr2	.	.	.	No	.	.	No	.	.
FRAG00055	PL00055	GFPtswap_11	normal	normal	normal	plus	normal	Yes	Chr4	.	.	.	No	.	.	No	.	.
FRAG00058	PL00058	GFPtswap_11	normal	normal	normal	plus	normal	Yes	Chr4	.	.	.	No	.	.	No	.	.
FRAG00059	PL00059	GFPtswap_11	plus	normal	normal	normal	normal	No	.	.	.	.	Yes	Chr1	.	No	.	.
FRAG00061	PL00061	GFPtswap_11	normal	normal	normal	normal	plus	Yes	Chr5	.	.	.	No	.	.	No	.	.
FRAG00062	PL00062	GFPtswap_11	plus	normal	normal	normal	normal	No	.	.	.	.	No	.	.	Yes	Chr1	.
FRAG00063	PL00063	GFPtswap_11	normal	normal	normal	normal	plus	Yes	Chr5	.	.	.	No	.	.	No	.	.
FRAG00064	PL00064	GFPtswap_11	normal	normal	normal	normal	plus	Yes	Chr5	.	.	.	No	.	.	No	.	.
FRAG00065	PL00065	GFPtswap_11	plus	normal	normal	normal	plus	Yes	Chr5	.	.	.	Yes	Chr1	.	No	.	.
FRAG00066	PL00066	GFPtswap_11	normal	normal	normal	plus	normal	Yes	Chr4	.	.	.	No	.	.	No	.	.
FRAG00067	PL00067	GFPtswap_11	normal	normal	normal	plus	normal	Yes	Chr4	.	.	.	No	.	.	No	.	.
FRAG00068	PL00068	GFPtswap_11	normal	normal	plus	normal	normal	Yes	Chr3	.	.	.	No	.	.	No	.	.
FRAG00069	PL00069	GFPtswap_11	normal	normal	normal	normal	plus	Yes	Chr5	.	.	.	No	.	.	No	.	.
FRAG00071	PL00071	GFPtswap_11	normal	normal	normal	plus	normal	Yes	Chr4	.	.	.	No	.	.	No	.	.
FRAG00072	PL00072	GFPtswap_11	plus	normal	normal	normal	plus	Yes	Chr1	Chr5	.	.	No	.	.	No	.	.
FRAG00073	PL00073	GFPtswap_11	plus	normal	normal	normal	normal	Yes	Chr1	.	.	.	No	.	.	No	.	.
FRAG00074	PL00074	GFPtswap_11	normal	normal	normal	normal	plus	Yes	Chr5	.	.	.	No	.	.	No	.	.
FRAG00075	PL00075	GFPtswap_11	normal	normal	minus	normal	normal	Yes	Chr3	.	.	.	No	.	.	No	.	.
FRAG00076	PL00076	GFPtswap_11	normal	normal	normal	plus	normal	Yes	Chr4	.	.	.	No	.	.	No	.	.
FRAG00078	PL00078	GFPtswap_11	normal	normal	normal	normal	plus	No	.	.	.	.	Yes	Chr5	.	No	.	.
FRAG00079	PL00079	GFPtswap_11	normal	normal	plus	normal	normal	Yes	Chr3	.	.	.	No	.	.	No	.	.
FRAG00081	PL00081	GFPtswap_11	normal	normal	normal	plus	normal	No	.	.	.	.	No	.	.	Yes	Chr4	.
FRAG00082	PL00082	GFPtswap_11	plus	normal	normal	plus	normal	Yes	Chr1	Chr4	.	.	No	.	.	No	.	.
FRAG00083	PL00083	GFPtswap_11	normal	normal	normal	normal	plus	Yes	Chr5	.	.	.	No	.	.	No	.	.
FRAG00084	PL00084	GFPtswap_11	normal	normal	normal	normal	plus	Yes	Chr5	.	.	.	No	.	.	No	.	.
FRAG00088	PL00088	GFPtswap_11	normal	normal	normal	normal	plus	Yes	Chr5	.	.	.	No	.	.	No	.	.
FRAG00089	PL00089	GFPtswap_11	normal	normal	normal	plus	normal	Yes	Chr4	.	.	.	No	.	.	No	.	.
FRAG00092	PL00092	GFPtswap_11	normal	normal	normal	plus	normal	Yes	Chr4	.	.	.	No	.	.	No	.	.
FRAG00093	PL00093	GFPtswap_11	normal	normal	normal	plus	normal	Yes	Chr4	.	.	.	No	.	.	No	.	.
FRAG00096	PL00096	GFPtswap_11	normal	normal	normal	normal	plus	No	.	.	.	.	Yes	Chr5	.	No	.	.
FRAG00097	PL00097	GFPtswap_11	normal	normal	normal	plus	plus	Yes	Chr4	Chr5	.	.	No	.	.	No	.	.
FRAG00103	PL00103	GFPtswap_11	normal	normal	minus	normal	normal	No	.	.	.	.	Yes	Chr3	.	No	.	.
FRAG00104	PL00104	GFPtswap_11	normal	normal	plus	normal	normal	No	.	.	.	.	Yes	Chr3	.	No	.	.
FRAG00106	PL00106	GFPtswap_11	normal	plus	normal	normal	normal	Yes	Chr2	.	.	.	No	.	.	No	.	.
FRAG00107	PL00107	GFPtswap_11	plus	normal	normal	normal	normal	No	.	.	.	.	No	.	.	Yes	Chr1	.
FRAG00108	PL00108	GFPtswap_11	plus	normal	normal	normal	normal	Yes	Chr1	.	.	.	No	.	.	No	.	.
FRAG00109	PL00109	GFPtswap_11	normal	normal	normal	plus	normal	Yes	Chr4	.	.	.	No	.	.	No	.	.
FRAG00111	PL00111	GFPtswap_11	normal	normal	normal	plus	normal	Yes	Chr4	.	.	.	No	.	.	No	.	.
FRAG00112	PL00112	GFPtswap_11	normal	normal	normal	plus	normal	Yes	Chr4	.	.	.	No	.	.	No	.	.
FRAG00113	PL00113	GFPtswap_11	plus	normal	normal	plus	normal	Yes	Chr1	Chr4	.	.	No	.	.	No	.	.
FRAG00114	PL00114	GFPtswap_11	plus	normal	plus	plus	plus	Yes	Chr1	Chr3	Chr4	Chr5	No	.	.	No	.	.
FRAG00115	PL00115	GFPtswap_11	normal	normal	normal	plus	normal	Yes	Chr4	.	.	.	No	.	.	No	.	.
FRAG00118	PL00118	GFPtswap_11	plus	plus	normal	normal	normal	Yes	Chr1	Chr2	.	.	No	.	.	No	.	.
FRAG00120	PL00120	GFPtswap_11	normal	normal	normal	plus	normal	Yes	Chr4	.	.	.	No	.	.	No	.	.
FRAG00123	PL00123	GFPtswap_11	plus	normal	plus	normal	normal	Yes	Chr1	Chr3	.	.	No	.	.	No	.	.
FRAG00125	PL00125	GFPtswap_11	normal	plus	normal	plus	normal	Yes	Chr2	Chr4	.	.	No	.	.	No	.	.
FRAG00126	PL00126	GFPtswap_11	plus	normal	plus	normal	normal	No	.	.	.	.	Yes	Chr1	Chr4	No	.	.
FRAG00127	PL00127	GFPtswap_11	normal	normal	normal	normal	minus	No	.	.	.	.	Yes	Chr5	.	No	.	.
FRAG00128	PL00128	GFPtswap_11	plus	normal	plus	plus	plus	Yes	Chr1	Chr3	Chr4	Chr5	No	.	.	No	.	.
FRAG00130	PL00130	GFPtswap_11	normal	normal	normal	plus	normal	Yes	Chr4	.	.	.	No	.	.	No	.	.
FRAG00131	PL00131	GFPtswap_11	plus	normal	normal	normal	normal	Yes	Chr1	.	.	.	No	.	.	No	.	.
FRAG00132	PL00132	GFPtswap_11	plus	normal	normal	normal	normal	Yes	Chr1	.	.	.	No	.	.	No	.	.
FRAG00133	PL00133	GFPtswap_11	plus	normal	plus	plus	normal	Yes	Chr1	Chr4	.	.	No	.	.	Yes	Chr3	.
FRAG00134	PL00134	GFPtswap_11	normal	normal	normal	normal	plus	Yes	Chr5	.	.	.	No	.	.	No	.	.
FRAG00135	PL00135	GFPtswap_11	normal	plus	normal	plus	normal	Yes	Chr4	.	.	.	No	.	.	Yes	Chr2	.
FRAG00137	PL00137	GFPtswap_11	normal	plus	normal	plus	plus	Yes	Chr2	Chr4	Chr5	.	No	.	.	No	.	.
FRAG00139	PL00139	GFPtswap_11	plus	normal	normal	normal	normal	Yes	Chr1	.	.	.	No	.	.	No	.	.
FRAG00140	PL00140	GFPtswap_11	normal	normal	minus	normal	normal	Yes	Chr3	.	.	.	No	.	.	No	.	.
FRAG00141	PL00141	GFPtswap_11	normal	normal	plus	normal	normal	No	.	.	.	.	Yes	Chr3	.	No	.	.
FRAG00142	PL00142	GFPtswap_11	normal	normal	normal	plus	normal	Yes	Chr4	.	.	.	No	.	.	No	.	.
FRAG00144	PL00144	GFPtswap_11	normal	normal	normal	normal	plus	No	.	.	.	.	No	.	.	Yes	Chr5	.
FRAG00150	PL00150	GFPtswap_11	normal	normal	normal	minus	normal	No	.	.	.	.	Yes	Chr4	.	No	.	.
FRAG00151	PL00151	GFPtswap_11	normal	normal	normal	plus	normal	Yes	Chr4	.	.	.	No	.	.	No	.	.
FRAG00152	PL00152	GFPtswap_11	plus	normal	plus	normal	normal	Yes	Chr1	Chr3	.	.	No	.	.	No	.	.
FRAG00153	PL00153	GFPtswap_11	normal	normal	plus	normal	normal	Yes	Chr3	.	.	.	No	.	.	No	.	.
FRAG00154	PL00154	GFPtswap_11	normal	plus	normal	normal	normal	Yes	Chr2	.	.	.	No	.	.	No	.	.
FRAG00155	PL00155	GFPtswap_11	normal	normal	plus	plus	normal	Yes	Chr3	Chr4	.	.	No	.	.	No	.	.
FRAG00156	PL00156	GFPtswap_11	normal	normal	normal	plus	normal	Yes	Chr4	.	.	.	No	.	.	No	.	.
FRAG00157	PL00157	GFPtswap_11	normal	plus	normal	plus	normal	Yes	Chr4	.	.	.	No	.	.	Yes	Chr2	.
FRAG00158	PL00158	GFPtswap_11	normal	plus	normal	normal	normal	Yes	Chr2	.	.	.	No	.	.	No	.	.
FRAG00159	PL00159	GFPtswap_11	normal	plus	normal	normal	plus	Yes	Chr2	Chr5	.	.	No	.	.	No	.	.
FRAG00161	PL00161	GFPtswap_11	normal	plus	normal	normal	normal	Yes	Chr2	.	.	.	No	.	.	No	.	.
FRAG00162	PL00162	GFPtswap_11	normal	plus	normal	normal	normal	Yes	Chr2	.	.	.	No	.	.	No	.	.
FRAG00163	PL00163	GFPtswap_11	normal	normal	normal	normal	plus	Yes	Chr5	.	.	.	No	.	.	No	.	.
FRAG00164	PL00164	GFPtswap_11	normal	normal	plus	normal	normal	No	.	.	.	.	No	.	.	Yes	Chr3	.
FRAG00165	PL00165	GFPtswap_11	normal	normal	plus	normal	plus	Yes	Chr5	.	.	.	Yes	Chr3	.	No	.	.
FRAG00166	PL00166	GFPtswap_11	plus	normal	plus	normal	normal	Yes	Chr3	.	.	.	No	.	.	Yes	Chr1	.
FRAG00167	PL00167	GFPtswap_11	plus	plus	normal	normal	normal	Yes	Chr1	Chr2	.	.	No	.	.	No	.	.
FRAG00172	PL00172	GFPtswap_11	normal	normal	normal	plus	normal	No	.	.	.	.	Yes	Chr4	.	No	.	.
FRAG00173	PL00173	GFPtswap_11	normal	plus	normal	normal	plus	Yes	Chr2	Chr5	.	.	No	.	.	No	.	.
FRAG00177	PL00177	GFPtswap_11	normal	normal	normal	normal	plus	Yes	Chr5	.	.	.	No	.	.	No	.	.
FRAG00179	PL00179	GFPtswap_11	normal	plus	normal	normal	normal	Yes	Chr2	.	.	.	No	.	.	No	.	.
FRAG00181	PL00181	GFPtswap_11	normal	plus	normal	normal	normal	Yes	Chr2	.	.	.	No	.	.	No	.	.
FRAG00182	PL00182	GFPtswap_11	plus	normal	plus	normal	normal	Yes	Chr1	Chr3	.	.	No	.	.	No	.	.
FRAG00184	PL00184	GFPtswap_11	plus	normal	normal	normal	normal	Yes	Chr1	.	.	.	No	.	.	No	.	.
FRAG00185	PL00185	GFPtswap_11	normal	normal	normal	plus	normal	No	.	.	.	.	No	.	.	Yes	Chr4	.
FRAG00187	PL00187	GFPtswap_11	normal	plus	normal	normal	normal	Yes	Chr2	.	.	.	No	.	.	No	.	.
FRAG00189	PL00189	GFPtswap_11	plus	normal	normal	normal	plus	Yes	Chr1	Chr5	.	.	No	.	.	No	.	.
FRAG00190	PL00190	GFPtswap_11	plus	normal	normal	normal	normal	Yes	Chr1	.	.	.	No	.	.	No	.	.
FRAG00192	PL00192	GFPtswap_11	normal	normal	normal	normal	plus	No	.	.	.	.	Yes	Chr5	.	No	.	.
FRAG00193	PL00193	GFPtswap_11	normal	minus	normal	normal	normal	No	.	.	.	.	Yes	Chr2	.	No	.	.
FRAG00194	PL00194	GFPtswap_11	normal	normal	plus	plus	normal	Yes	Chr4	.	.	.	Yes	Chr3	.	No	.	.
FRAG00196	PL00196	GFPtswap_11	normal	normal	plus	plus	normal	Yes	Chr3	Chr4	.	.	No	.	.	No	.	.
FRAG00197	PL00197	GFPtswap_11	normal	normal	normal	normal	plus	Yes	Chr5	.	.	.	No	.	.	No	.	.
FRAG00198	PL00198	GFPtswap_11	normal	normal	normal	normal	plus	Yes	Chr5	.	.	.	No	.	.	No	.	.
FRAG00199	PL00199	GFPtswap_11	plus	normal	normal	normal	normal	Yes	Chr1	.	.	.	No	.	.	No	.	.
FRAG00200	PL00200	GFPtswap_11	plus	minus	normal	normal	normal	No	.	.	.	.	Yes	Chr1	Chr2	No	.	.
FRAG00204	PL00204	GFPtswap_11	normal	plus	normal	plus	plus	Yes	Chr2	Chr4	.	.	Yes	Chr5	.	No	.	.
FRAG00205	PL00205	GFPtswap_11	normal	plus	normal	normal	normal	Yes	Chr2	.	.	.	No	.	.	No	.	.
FRAG00206	PL00206	GFPtswap_11	normal	normal	normal	plus	normal	Yes	Chr4	.	.	.	No	.	.	No	.	.
FRAG00208	PL00208	GFPtswap_11	normal	normal	normal	plus	normal	Yes	Chr4	.	.	.	No	.	.	No	.	.
FRAG00209	PL00209	GFPtswap_11	normal	normal	normal	plus	normal	Yes	Chr4	.	.	.	No	.	.	No	.	.
FRAG00211	PL00211	GFPtswap_11	normal	normal	plus	plus	normal	Yes	Chr3	Chr4	.	.	No	.	.	No	.	.
FRAG00212	PL00212	GFPtswap_11	normal	normal	normal	plus	normal	Yes	Chr4	.	.	.	No	.	.	No	.	.
FRAG00214	PL00214	GFPtswap_11	plus	normal	plus	normal	normal	Yes	Chr3	.	.	.	Yes	Chr1	.	No	.	.
FRAG00215	PL00215	GFPtswap_11	normal	normal	normal	plus	normal	Yes	Chr4	.	.	.	No	.	.	No	.	.
FRAG00216	PL00216	GFPtswap_17	normal	plus	normal	normal	normal	Yes	Chr2	.	.	.	No	.	.	No	.	.
FRAG00217	PL00217	GFPtswap_17	plus	normal	normal	normal	normal	Yes	Chr1	.	.	.	No	.	.	No	.	.
FRAG00218	PL00218	GFPtswap_17	normal	normal	normal	plus	normal	Yes	Chr4	.	.	.	No	.	.	No	.	.
FRAG00219	PL00219	GFPtswap_17	normal	normal	normal	plus	normal	Yes	Chr4	.	.	.	No	.	.	No	.	.
FRAG00220	PL00220	GFPtswap_17	normal	normal	normal	normal	plus	Yes	Chr5	.	.	.	No	.	.	No	.	.
FRAG00221	PL00221	GFPtswap_17	plus	normal	normal	plus	normal	Yes	Chr1	Chr4	.	.	No	.	.	No	.	.
FRAG00224	PL00224	GFPtswap_17	normal	plus	normal	normal	normal	No	.	.	.	.	No	.	.	Yes	Chr2	.
FRAG00225	PL00225	GFPtswap_17	normal	normal	normal	plus	plus	Yes	Chr4	.	.	.	Yes	Chr5	.	No	.	.
FRAG00226	PL00226	GFPtswap_17	normal	normal	plus	normal	normal	No	.	.	.	.	Yes	Chr3	.	No	.	.
FRAG00227	PL00227	GFPtswap_17	normal	normal	minus	normal	normal	Yes	Chr3	.	.	.	No	.	.	No	.	.
FRAG00228	PL00228	GFPtswap_17	normal	plus	normal	normal	normal	Yes	Chr2	.	.	.	No	.	.	No	.	.
FRAG00229	PL00229	GFPtswap_17	normal	normal	normal	plus	normal	No	.	.	.	.	Yes	Chr4	.	No	.	.
FRAG00230	PL00230	GFPtswap_17	normal	plus	normal	normal	normal	Yes	Chr2	.	.	.	No	.	.	No	.	.
FRAG00231	PL00231	GFPtswap_17	normal	plus	normal	normal	normal	Yes	Chr2	.	.	.	No	.	.	No	.	.
FRAG00232	PL00232	GFPtswap_17	normal	plus	normal	plus	normal	Yes	Chr4	.	.	.	No	.	.	Yes	Chr2	.
FRAG00233	PL00233	GFPtswap_17	normal	normal	normal	plus	normal	Yes	Chr4	.	.	.	No	.	.	No	.	.
FRAG00234	PL00234	GFPtswap_17	plus	normal	normal	normal	normal	Yes	Chr1	.	.	.	No	.	.	No	.	.
FRAG00236	PL00236	GFPtswap_17	plus	normal	normal	normal	normal	Yes	Chr1	.	.	.	No	.	.	No	.	.
FRAG00237	PL00237	GFPtswap_17	normal	normal	plus	plus	normal	Yes	Chr3	Chr4	.	.	No	.	.	No	.	.
FRAG00239	PL00239	GFPtswap_17	normal	plus	normal	normal	plus	Yes	Chr2	Chr5	.	.	No	.	.	No	.	.
FRAG00240	PL00240	GFPtswap_17	normal	normal	plus	normal	normal	No	.	.	.	.	No	.	.	Yes	Chr2	.
FRAG00242	PL00242	GFPtswap_17	plus	normal	normal	normal	normal	Yes	Chr1	.	.	.	No	.	.	No	.	.
FRAG00243	PL00243	GFPtswap_17	normal	normal	plus	plus	normal	No	.	.	.	.	Yes	Chr3	Chr4	No	.	.
FRAG00244	PL00244	GFPtswap_17	normal	normal	normal	plus	plus	No	.	.	.	.	Yes	Chr4	Chr5	No	.	.
FRAG00245	PL00245	GFPtswap_17	normal	normal	plus	normal	normal	Yes	Chr3	.	.	.	No	.	.	No	.	.
FRAG00247	PL00247	GFPtswap_17	normal	plus	normal	normal	normal	Yes	Chr2	.	.	.	No	.	.	No	.	.
FRAG00248	PL00248	GFPtswap_17	normal	normal	plus	normal	normal	No	.	.	.	.	Yes	Chr3	.	No	.	.
FRAG00249	PL00249	GFPtswap_17	normal	normal	plus	normal	normal	Yes	Chr3	.	.	.	No	.	.	No	.	.
FRAG00250	PL00250	GFPtswap_17	normal	normal	normal	plus	normal	Yes	Chr4	.	.	.	No	.	.	No	.	.
FRAG00251	PL00251	GFPtswap_17	normal	plus	normal	normal	normal	Yes	Chr2	.	.	.	No	.	.	No	.	.
FRAG00252	PL00252	GFPtswap_17	plus	plus	normal	plus	normal	Yes	Chr1	Chr2	Chr4	.	No	.	.	No	.	.
FRAG00253	PL00253	GFPtswap_17	normal	plus	normal	normal	normal	Yes	Chr2	.	.	.	No	.	.	No	.	.
FRAG00254	PL00254	GFPtswap_17	normal	plus	normal	normal	normal	Yes	Chr2	.	.	.	No	.	.	No	.	.
FRAG00255	PL00255	GFPtswap_17	normal	normal	normal	plus	normal	Yes	Chr4	.	.	.	No	.	.	No	.	.
FRAG00256	PL00256	GFPtswap_17	normal	plus	normal	normal	normal	Yes	Chr2	.	.	.	No	.	.	No	.	.
FRAG00257	PL00257	GFPtswap_17	plus	normal	normal	normal	normal	Yes	Chr1	.	.	.	No	.	.	No	.	.
FRAG00258	PL00258	GFPtswap_17	normal	normal	plus	normal	normal	Yes	Chr3	.	.	.	No	.	.	No	.	.
FRAG00259	PL00259	GFPtswap_17	normal	normal	plus	normal	normal	No	.	.	.	.	Yes	Chr3	.	No	.	.
FRAG00260	PL00260	GFPtswap_17	plus	minus	normal	plus	plus	Yes	Chr1	Chr4	Chr5	.	Yes	Chr2	.	No	.	.
FRAG00261	PL00261	GFPtswap_17	plus	normal	normal	normal	normal	No	.	.	.	.	No	.	.	Yes	Chr1	.
FRAG00262	PL00262	GFPtswap_17	normal	minus	plus	normal	normal	Yes	Chr3	.	.	.	Yes	Chr2	.	No	.	.
FRAG00263	PL00263	GFPtswap_17	normal	normal	normal	plus	normal	Yes	Chr4	.	.	.	No	.	.	No	.	.
FRAG00264	PL00264	GFPtswap_17	normal	normal	normal	normal	plus	Yes	Chr5	.	.	.	No	.	.	No	.	.
FRAG00265	PL00265	GFPtswap_17	normal	normal	plus	normal	normal	No	.	.	.	.	No	.	.	Yes	Chr3	.
FRAG00266	PL00266	GFPtswap_17	normal	normal	plus	normal	normal	No	.	.	.	.	Yes	Chr3	.	No	.	.
FRAG00267	PL00267	GFPtswap_17	plus	normal	normal	normal	normal	No	.	.	.	.	Yes	Chr1	.	No	.	.
FRAG00268	PL00268	GFPtswap_17	normal	normal	plus	plus	normal	Yes	Chr3	Chr4	.	.	No	.	.	No	.	.
FRAG00270	PL00270	GFPtswap_17	plus	normal	plus	normal	normal	Yes	Chr1	Chr3	.	.	No	.	.	No	.	.
FRAG00272	PL00272	GFPtswap_17	normal	minus	normal	normal	normal	Yes	Chr2	.	.	.	No	.	.	No	.	.
FRAG00273	PL00273	GFPtswap_17	normal	plus	normal	plus	normal	No	.	.	.	.	No	.	.	Yes	Chr2	Chr4
FRAG00275	PL00275	GFPtswap_17	normal	normal	plus	normal	normal	Yes	Chr3	.	.	.	No	.	.	No	.	.
FRAG00276	PL00276	GFPtswap_17	normal	plus	normal	plus	normal	Yes	Chr2	.	.	.	Yes	Chr4	.	No	.	.
FRAG00279	PL00279	GFPtswap_17	normal	normal	minus	normal	normal	No	.	.	.	.	Yes	Chr3	.	No	.	.
FRAG00280	PL00280	GFPtswap_17	normal	plus	normal	normal	normal	No	.	.	.	.	Yes	Chr2	.	No	.	.
FRAG00282	PL00282	GFPtswap_17	normal	minus	normal	normal	normal	Yes	Chr2	.	.	.	No	.	.	No	.	.
FRAG00283	PL00283	GFPtswap_17	normal	normal	normal	normal	minus	No	.	.	.	.	Yes	Chr5	.	No	.	.
FRAG00284	PL00284	GFPtswap_17	plus	normal	normal	plus	normal	Yes	Chr4	.	.	.	Yes	Chr1	.	No	.	.
FRAG00285	PL00285	GFPtswap_17	normal	normal	plus	normal	normal	Yes	Chr3	.	.	.	No	.	.	No	.	.
FRAG00434	PL00434	GFPtswap_22	plus	normal	normal	normal	normal	No	.	.	.	.	Yes	Chr1	.	No	.	.
FRAG00435	PL00435	GFPtswap_22	normal	normal	plus	normal	normal	Yes	Chr3	.	.	.	No	.	.	No	.	.
FRAG00436	PL00436	GFPtswap_22	plus	normal	plus	normal	plus	Yes	Chr1	Chr3	Chr5	.	No	.	.	No	.	.
FRAG00437	PL00437	GFPtswap_22	normal	normal	normal	plus	plus	Yes	Chr5	.	.	.	Yes	Chr4	.	No	.	.
FRAG00438	PL00438	GFPtswap_22	normal	normal	normal	plus	normal	Yes	Chr4	.	.	.	No	.	.	No	.	.
FRAG00439	PL00439	GFPtswap_22	plus	normal	normal	normal	normal	Yes	Chr1	.	.	.	No	.	.	No	.	.
FRAG00441	PL00441	GFPtswap_22	normal	normal	normal	plus	normal	Yes	Chr4	.	.	.	No	.	.	No	.	.
FRAG00442	PL00442	GFPtswap_22	normal	normal	plus	normal	normal	Yes	Chr3	.	.	.	No	.	.	No	.	.
FRAG00444	PL00444	GFPtswap_22	normal	normal	normal	plus	normal	Yes	Chr4	.	.	.	Yes	Chr3	.	No	.	.
FRAG00445	PL00445	GFPtswap_22	normal	normal	normal	plus	normal	No	.	.	.	.	Yes	Chr4	.	No	.	.
FRAG00446	PL00446	GFPtswap_22	normal	plus	normal	normal	normal	Yes	Chr4	.	.	.	No	.	.	No	.	.
FRAG00447	PL00447	GFPtswap_22	normal	normal	normal	plus	normal	Yes	Chr4	.	.	.	No	.	.	No	.	.
FRAG00449	PL00449	GFPtswap_22	normal	normal	normal	plus	normal	Yes	Chr4	.	.	.	No	.	.	No	.	.
FRAG00451	PL00451	GFPtswap_22	normal	normal	normal	plus	normal	Yes	Chr4	.	.	.	No	.	.	No	.	.
FRAG00452	PL00452	GFPtswap_22	normal	plus	normal	normal	normal	No	.	.	.	.	Yes	Chr2	.	No	.	.
FRAG00453	PL00453	GFPtswap_22	normal	normal	normal	normal	plus	Yes	Chr5	.	.	.	Yes	Chr4	.	No	.	.
FRAG00454	PL00454	GFPtswap_22	normal	plus	normal	plus	plus	Yes	Chr2	.	.	.	No	.	.	Yes	Chr5	.
FRAG00456	PL00456	GFPtswap_22	normal	plus	normal	normal	normal	No	.	.	.	.	Yes	Chr2	.	No	.	.
FRAG00457	PL00457	GFPtswap_22	normal	plus	normal	normal	normal	Yes	Chr2	.	.	.	No	.	.	No	.	.
FRAG00459	PL00459	GFPtswap_22	plus	normal	normal	normal	normal	Yes	Chr1	.	.	.	No	.	.	No	.	.
FRAG00460	PL00460	GFPtswap_22	normal	plus	plus	normal	normal	Yes	Chr2	Chr3	.	.	No	.	.	No	.	.
FRAG00461	PL00461	GFPtswap_22	normal	plus	normal	normal	normal	Yes	Chr2	.	.	.	No	.	.	No	.	.
FRAG00462	PL00462	GFPtswap_22	plus	normal	plus	normal	normal	Yes	Chr3	.	.	.	Yes	Chr1	.	No	.	.
FRAG00463	PL00463	GFPtswap_22	normal	normal	plus	normal	normal	Yes	Chr3	.	.	.	No	.	.	No	.	.
FRAG00467	PL00467	GFPtswap_22	normal	plus	normal	normal	plus	Yes	Chr2	Chr5	.	.	No	.	.	No	.	.
FRAG00468	PL00468	GFPtswap_22	plus	normal	plus	plus	normal	Yes	Chr1	Chr4	.	.	No	.	.	Yes	Chr3	.
FRAG00469	PL00469	GFPtswap_22	plus	plus	normal	plus	plus	Yes	Chr1	Chr2	Chr4	Chr5	No	.	.	No	.	.
FRAG00471	PL00471	GFPtswap_22	plus	normal	normal	normal	normal	Yes	Chr1	.	.	.	No	.	.	No	.	.
FRAG00472	PL00472	GFPtswap_22	normal	minus	normal	normal	normal	No	.	.	.	.	Yes	Chr2	.	No	.	.
FRAG00473	PL00473	GFPtswap_22	normal	plus	normal	normal	normal	No	.	.	.	.	Yes	Chr2	.	No	.	.
FRAG00475	PL00475	GFPtswap_22	normal	normal	normal	normal	plus	Yes	Chr5	.	.	.	No	.	.	No	.	.
FRAG00476	PL00476	GFPtswap_22	normal	normal	plus	normal	normal	Yes	Chr3	.	.	.	No	.	.	No	.	.
FRAG00478	PL00478	GFPtswap_22	plus	plus	plus	plus	normal	Yes	Chr1	Chr2	Chr3	Chr4	No	.	.	No	.	.
FRAG00480	PL00480	GFPtswap_22	normal	normal	normal	normal	plus	Yes	Chr5	.	.	.	No	.	.	No	.	.
FRAG00481	PL00481	GFPtswap_22	normal	plus	normal	normal	normal	No	.	.	.	.	Yes	Chr2	.	No	.	.
FRAG00482	PL00482	GFPtswap_22	normal	plus	plus	normal	normal	Yes	Chr3	.	.	.	Yes	Chr2	.	No	.	.
FRAG00825	PL00825	GFPtswap_22	normal	normal	plus	normal	normal	Yes	Chr3	.	.	.	No	.	.	No	.	.
FRAG00828	PL00828	GFPtswap_22	normal	normal	normal	plus	normal	Yes	Chr4	.	.	.	No	.	.	No	.	.
FRAG00837	PL00837	GFPtswap_22	normal	normal	plus	normal	normal	Yes	Chr3	.	.	.	No	.	.	No	.	.
FRAG00838	PL00838	GFPtswap_22	normal	normal	minus	normal	normal	Yes	Chr3	.	.	.	No	.	.	No	.	.
FRAG00839	PL00839	GFPtswap_22	normal	normal	normal	plus	normal	Yes	Chr4	.	.	.	No	.	.	No	.	.
FRAG00843	PL00843	GFPtswap_22	normal	plus	normal	normal	normal	No	.	.	.	.	No	.	.	Yes	Chr2	.
FRAG00847	PL00847	GFPtswap_22	plus	normal	normal	normal	normal	No	.	.	.	.	Yes	Chr1	.	No	.	.
FRAG00850	PL00850	GFPtswap_22	normal	normal	plus	plus	normal	Yes	Chr3	Chr4	.	.	No	.	.	No	.	.
FRAG00856	PL00856	GFPtswap_22	normal	normal	plus	normal	normal	Yes	Chr3	.	.	.	No	.	.	No	.	.
FRAG00857	PL00857	GFPtswap_22	normal	normal	plus	normal	normal	Yes	Chr3	.	.	.	No	.	.	No	.	.
FRAG00858	PL00858	GFPtswap_22	plus	normal	normal	normal	normal	Yes	Chr1	.	.	.	No	.	.	No	.	.
FRAG00861	PL00861	GFPtswap_22	normal	normal	plus	normal	normal	Yes	Chr3	.	.	.	No	.	.	No	.	.
FRAG00865	PL00865	GFPtswap_22	normal	normal	normal	plus	normal	Yes	Chr4	.	.	.	No	.	.	No	.	.
FRAG00867	PL00867	GFPtswap_22	normal	normal	plus	plus	normal	Yes	Chr4	.	.	.	No	.	.	Yes	Chr3	.
FRAG00869	PL00869	GFPtswap_22	plus	normal	normal	normal	normal	Yes	Chr1	.	.	.	No	.	.	No	.	.
FRAG00870	PL00870	GFPtswap_22	normal	minus	normal	normal	normal	Yes	Chr2	.	.	.	No	.	.	No	.	.
FRAG00875	PL00875	GFPtswap_22	normal	normal	plus	normal	normal	No	.	.	.	.	No	.	.	Yes	Chr3	.
FRAG00877	PL00877	GFPtswap_22	normal	normal	normal	normal	minus	No	.	.	.	.	Yes	Chr5	.	No	.	.
FRAG00879	PL00879	GFPtswap_22	normal	normal	normal	normal	minus	No	.	.	.	.	Yes	Chr5	.	No	.	.
FRAG00883	PL00883	GFPtswap_22	normal	normal	normal	normal	plus	Yes	Chr5	.	.	.	No	.	.	No	.	.
FRAG00884	PL00884	GFPtswap_22	normal	normal	plus	normal	normal	Yes	Chr3	.	.	.	No	.	.	No	.	.
