# Supplementary material for: Catastrophic chromosomal restructuring during genome elimination in plants
Source: eLife. 2015 May 15;4:e06516. doi: 10.7554/eLife.06516 (PMC4461816; doi:10.7554/eLife.06516)
Supplement: Supplementary file 2. — List of aneuploid individuals obtained from selfed Col-0 triploids. Unique identifiers (FRAG IDs) are listed for each individual and indicate which specific chromosomes displayed the numerical aneuploid chromosome type. DOI: http://dx.doi.org/10.7554/eLife.06516.021 [file elife-06516-supp2.xls]

## Sheet: Sheet1
FRAG_ID	PLANT_ID	Chr1	Chr2	Chr3	Chr4	Chr5	Numerical	Num Chr #1	Num Chr #2	Num Chr #3	Num Chr #4
FRAG00312	PL00312	plus	plus	plus	plus	normal	1	Chr1	Chr2	Chr3	Chr4
FRAG00313	PL00313	normal	plus	normal	plus	normal	1	Chr2	Chr4	.	.
FRAG00314	PL00314	normal	plus	normal	normal	normal	1	Chr2	.	.	.
FRAG00315	PL00315	plus	normal	normal	plus	normal	1	Chr1	Chr4	.	.
FRAG00316	PL00316	plus	plus	plus	plus	normal	1	Chr1	Chr2	Chr3	Chr4
FRAG00317	PL00317	plus	normal	plus	normal	plus	1	Chr1	Chr3	Chr5	.
FRAG00318	PL00318	normal	normal	normal	normal	normal	.	.	.	.	.
FRAG00319	PL00319	plus	normal	normal	plus	plus	1	Chr1	Chr4	Chr5	.
FRAG00320	PL00320	plus	normal	normal	normal	plus	1	Chr1	Chr5	.	.
FRAG00321	PL00321	normal	normal	normal	normal	normal	.	.	.	.	.
FRAG00322	PL00322	plus	normal	normal	normal	normal	1	Chr1	.	.	.
FRAG00323	PL00323	plus	normal	normal	normal	plus	1	Chr1	Chr5	.	.
FRAG00324	PL00324	normal	normal	normal	plus	normal	1	Chr4	.	.	.
FRAG00325	PL00325	normal	plus	normal	normal	plus	1	Chr2	Chr5	.	.
FRAG00326	PL00326	normal	normal	normal	normal	normal	.	.	.	.	.
FRAG00327	PL00327	normal	plus	normal	plus	plus	1	Chr2	Chr4	Chr5	.
FRAG00328	PL00328	normal	plus	normal	normal	normal	1	Chr2	.	.	.
FRAG00329	PL00329	normal	normal	plus	plus	normal	1	Chr3	Chr4	.	.
FRAG00330	PL00330	normal	plus	normal	normal	normal	1	Chr2	.	.	.
FRAG00331	PL00331	normal	normal	normal	normal	normal	.	.	.	.	.
FRAG00332	PL00332	plus	plus	normal	plus	plus	1	Chr1	Chr2	Chr4	Chr5
FRAG00333	PL00333	normal	plus	normal	normal	normal	1	Chr2	.	.	.
FRAG00334	PL00334	normal	normal	normal	plus	normal	1	Chr4	.	.	.
FRAG00335	PL00335	normal	normal	normal	normal	plus	1	Chr5	.	.	.
FRAG00336	PL00336	normal	normal	normal	plus	normal	1	Chr4	.	.	.
FRAG00337	PL00337	plus	normal	normal	normal	normal	1	Chr1	.	.	.
FRAG00338	PL00338	plus	normal	plus	plus	normal	1	Chr1	Chr3	Chr4	.
FRAG00339	PL00339	normal	normal	normal	plus	normal	1	Chr4	.	.	.
FRAG00340	PL00340	normal	normal	plus	plus	normal	1	Chr3	Chr4	.	.
FRAG00341	PL00341	normal	normal	normal	normal	normal	.	.	.	.	.
FRAG00342	PL00342	plus	plus	normal	normal	plus	1	Chr1	Chr2	Chr5	.
FRAG00343	PL00343	normal	plus	normal	plus	normal	1	Chr2	Chr4	.	.
FRAG00344	PL00344	normal	normal	plus	normal	normal	1	Chr3	.	.	.
FRAG00345	PL00345	normal	plus	normal	normal	plus	1	Chr2	Chr5	.	.
FRAG00346	PL00346	normal	normal	normal	plus	normal	1	Chr4	.	.	.
FRAG00347	PL00347	plus	normal	plus	plus	plus	1	Chr1	Chr3	Chr4	Chr5
FRAG00348	PL00348	normal	normal	normal	plus	normal	1	Chr4	.	.	.
FRAG00349	PL00349	plus	normal	plus	plus	plus	1	Chr1	Chr3	Chr4	Chr5
FRAG00350	PL00350	plus	normal	plus	plus	plus	1	Chr1	Chr3	Chr4	Chr5
FRAG00351	PL00351	plus	plus	normal	normal	plus	1	Chr1	Chr2	Chr5	.
FRAG00352	PL00352	normal	plus	normal	normal	normal	1	Chr2	.	.	.
FRAG00353	PL00353	plus	normal	normal	normal	normal	1	Chr1	.	.	.
FRAG00354	PL00354	plus	normal	plus	plus	plus	1	Chr1	Chr3	Chr4	Chr5
FRAG00355	PL00355	normal	plus	normal	normal	normal	1	Chr2	.	.	.
FRAG00356	PL00356	plus	plus	plus	normal	plus	1	Chr1	Chr2	Chr3	Chr5
FRAG00357	PL00357	plus	plus	plus	plus	normal	1	Chr1	Chr2	Chr3	Chr4
FRAG00358	PL00358	normal	normal	normal	normal	normal	.	.	.	.	.
FRAG00359	PL00359	normal	plus	normal	plus	plus	1	Chr2	Chr4	Chr5	.
FRAG00360	PL00360	plus	normal	normal	normal	plus	1	Chr1	Chr5	.	.
FRAG00361	PL00361	normal	normal	normal	normal	plus	1	Chr5	.	.	.
FRAG00362	PL00362	plus	normal	plus	normal	plus	1	Chr1	Chr3	Chr5	.
FRAG00363	PL00363	normal	plus	normal	normal	plus	1	Chr2	Chr5	.	.
FRAG00364	PL00364	plus	normal	plus	plus	normal	1	Chr1	Chr3	Chr4	.
FRAG00365	PL00365	plus	normal	normal	normal	normal	1	Chr1	.	.	.
FRAG00366	PL00366	normal	normal	plus	plus	normal	1	Chr3	Chr4	.	.
FRAG00367	PL00367	plus	plus	normal	plus	normal	1	Chr1	Chr2	Chr4	.
FRAG00368	PL00368	normal	plus	normal	normal	plus	1	Chr2	Chr5	.	.
FRAG00369	PL00369	plus	normal	normal	normal	normal	1	Chr1	.	.	.
FRAG00370	PL00370	plus	normal	plus	plus	plus	1	Chr1	Chr3	Chr4	Chr5
FRAG00371	PL00371	plus	normal	normal	plus	plus	1	Chr1	Chr4	Chr5	.
FRAG00372	PL00372	plus	normal	plus	normal	plus	1	Chr1	Chr3	Chr5	.
FRAG00373	PL00373	normal	normal	normal	normal	normal	.	.	.	.	.
FRAG00374	PL00374	plus	normal	plus	normal	plus	1	Chr1	Chr3	Chr5	.
FRAG00375	PL00375	normal	normal	normal	plus	plus	1	Chr4	Chr5	.	.
FRAG00376	PL00376	plus	normal	normal	normal	normal	1	Chr1	.	.	.
FRAG00377	PL00377	plus	plus	plus	normal	plus	1	Chr1	Chr2	Chr3	Chr5
FRAG00378	PL00378	plus	normal	plus	plus	plus	1	Chr1	Chr3	Chr4	Chr5
FRAG00379	PL00379	normal	plus	plus	normal	plus	1	Chr2	Chr3	Chr5	.
FRAG00380	PL00380	normal	normal	normal	normal	normal	.	.	.	.	.
FRAG00381	PL00381	plus	normal	plus	plus	plus	1	Chr1	Chr3	Chr4	Chr5
FRAG00382	PL00382	normal	normal	normal	normal	plus	1	Chr5	.	.	.
FRAG00383	PL00383	normal	normal	plus	normal	normal	1	Chr3	.	.	.
FRAG00384	PL00384	plus	normal	normal	normal	normal	1	Chr1	.	.	.
FRAG00385	PL00385	plus	normal	normal	normal	normal	1	Chr1	.	.	.
FRAG00386	PL00386	normal	plus	normal	plus	plus	1	Chr2	Chr3	Chr4	.
FRAG00387	PL00387	plus	normal	normal	plus	normal	1	Chr1	Chr4	.	.
FRAG00388	PL00388	plus	normal	plus	plus	plus	1	Chr1	Chr3	Chr4	Chr5
FRAG00389	PL00389	plus	normal	plus	plus	plus	1	Chr1	Chr3	Chr4	Chr5
FRAG00390	PL00390	normal	normal	plus	normal	plus	1	Chr2	Chr5	.	.
FRAG00391	PL00391	normal	normal	normal	plus	plus	1	Chr4	Chr5	.	.
FRAG00392	PL00392	plus	plus	plus	plus	normal	1	Chr1	Chr2	Chr3	Chr4
FRAG00393	PL00393	plus	normal	plus	normal	normal	1	Chr1	Chr3	.	.
FRAG00394	PL00394	normal	normal	normal	plus	plus	1	Chr4	Chr5	.	.
FRAG00395	PL00395	normal	normal	normal	plus	normal	1	Chr4	.	.	.
FRAG00396	PL00396	plus	normal	plus	plus	normal	1	Chr1	Chr3	Chr4	.
FRAG00397	PL00397	plus	plus	normal	normal	normal	1	Chr1	Chr2	.	.
FRAG00398	PL00398	plus	plus	plus	normal	normal	1	Chr1	Chr2	Chr3	.
FRAG00399	PL00399	plus	normal	plus	plus	plus	1	Chr1	Chr3	Chr4	Chr5
FRAG00400	PL00400	plus	plus	plus	plus	normal	1	Chr1	Chr2	Chr3	Chr4
FRAG00401	PL00401	normal	normal	normal	normal	normal	.	.	.	.	.
FRAG00402	PL00402	plus	normal	normal	normal	plus	1	Chr1	Chr5	.	.
FRAG00403	PL00403	normal	normal	plus	normal	normal	1	Chr3	.	.	.
FRAG00404	PL00404	normal	plus	normal	normal	plus	1	Chr2	Chr5	.	.
FRAG00405	PL00405	plus	plus	normal	normal	plus	1	Chr1	Chr2	Chr5	.
FRAG00406	PL00406	plus	normal	normal	normal	plus	1	Chr1	Chr5	.	.
FRAG00407	PL00407	normal	normal	plus	normal	plus	1	Chr3	Chr5	.	.
