# Supplementary material for: Catastrophic chromosomal restructuring during genome elimination in plants
Source: eLife. 2015 May 15;4:e06516. doi: 10.7554/eLife.06516 (PMC4461816; doi:10.7554/eLife.06516)
Supplement: Supplementary file 3. — List of diploid and aneuploid individuals obtained from selfed GFP-tailswap. Unique identifiers (FRAG IDs) are listed for each individual and indicate which specific chromosomes displayed the numerical aneuploid chromosome type. DOI: http://dx.doi.org/10.7554/eLife.06516.022 [file elife-06516-supp3.xls]

## Sheet: Sheet1
FRAG_ID	PLANT_ID	Chr1	Chr2	Chr3	Chr4	Chr5	Numerical	Num Chr #1
FRAG001160	PL001160	normal	normal	normal	normal	normal	.	.
FRAG001161	PL001161	normal	normal	normal	normal	normal	.	.
FRAG001162	PL001162	normal	normal	normal	normal	normal	.	.
FRAG001163	PL001163	normal	normal	normal	normal	normal	.	.
FRAG001164	PL001164	normal	normal	normal	normal	normal	.	.
FRAG001165	PL001165	normal	normal	normal	normal	normal	.	.
FRAG001166	PL001166	normal	normal	normal	normal	normal	.	.
FRAG001167	PL001167	normal	normal	normal	normal	normal	.	.
FRAG001168	PL001168	normal	normal	normal	normal	normal	.	.
FRAG001169	PL001169	normal	normal	normal	normal	normal	.	.
FRAG001170	PL001170	normal	normal	normal	normal	normal	.	.
FRAG001171	PL001171	normal	normal	normal	normal	normal	.	.
FRAG001172	PL001172	normal	normal	normal	normal	normal	.	.
FRAG001173	PL001173	normal	normal	normal	normal	normal	.	.
FRAG001174	PL001174	normal	normal	normal	normal	normal	.	.
FRAG001175	PL001175	normal	normal	normal	normal	normal	.	.
FRAG001176	PL001176	normal	normal	normal	normal	normal	.	.
FRAG001177	PL001177	normal	normal	normal	normal	normal	.	.
FRAG001178	PL001178	normal	normal	normal	normal	normal	.	.
FRAG001179	PL001179	normal	normal	normal	normal	normal	.	.
FRAG001180	PL001180	normal	normal	normal	normal	normal	.	.
FRAG001181	PL001181	normal	normal	normal	normal	normal	.	.
FRAG001182	PL001182	normal	normal	normal	normal	normal	.	.
FRAG001183	PL001183	normal	normal	normal	normal	normal	.	.
FRAG001184	PL001184	normal	normal	normal	normal	normal	.	.
FRAG001185	PL001185	normal	normal	normal	normal	normal	.	.
FRAG001186	PL001186	normal	normal	normal	normal	normal	.	.
FRAG001187	PL001187	normal	normal	normal	normal	normal	.	.
FRAG001188	PL001188	normal	normal	normal	normal	normal	.	.
FRAG001189	PL001189	normal	normal	normal	normal	normal	.	.
FRAG001190	PL001190	normal	normal	normal	normal	normal	.	.
FRAG001191	PL001191	normal	normal	normal	normal	normal	.	.
FRAG001192	PL001192	normal	normal	normal	normal	normal	.	.
FRAG001193	PL001193	normal	normal	normal	normal	normal	.	.
FRAG001194	PL001194	normal	normal	normal	normal	normal	.	.
FRAG001195	PL001195	normal	normal	normal	normal	normal	.	.
FRAG001196	PL001196	normal	normal	normal	normal	normal	.	.
FRAG001197	PL001197	normal	normal	normal	normal	normal	.	.
FRAG001198	PL001198	normal	normal	normal	normal	normal	.	.
FRAG001199	PL001199	normal	normal	normal	normal	normal	.	.
FRAG001200	PL001200	normal	normal	normal	normal	normal	.	.
FRAG001201	PL001201	normal	normal	normal	normal	normal	.	.
FRAG001202	PL001202	normal	normal	normal	normal	normal	.	.
FRAG001203	PL001203	normal	normal	normal	normal	normal	.	.
FRAG001204	PL001204	normal	normal	normal	normal	normal	.	.
FRAG001205	PL001205	normal	normal	normal	normal	normal	.	.
FRAG001206	PL001206	normal	normal	normal	normal	normal	.	.
FRAG001207	PL001207	normal	normal	normal	normal	normal	.	.
FRAG001208	PL001208	normal	normal	normal	normal	normal	.	.
FRAG001209	PL001209	normal	normal	normal	normal	normal	.	.
FRAG001210	PL001210	normal	normal	normal	normal	normal	.	.
FRAG001211	PL001211	normal	normal	normal	normal	normal	.	.
FRAG001212	PL001212	normal	normal	normal	normal	normal	.	.
FRAG001213	PL001213	normal	normal	normal	normal	normal	.	.
FRAG001214	PL001214	normal	normal	normal	normal	normal	.	.
FRAG001215	PL001215	normal	normal	normal	normal	normal	.	.
FRAG001216	PL001216	normal	normal	normal	normal	normal	.	.
FRAG001217	PL001217	normal	plus	normal	normal	normal	1	Chr2
FRAG001218	PL001218	normal	normal	normal	normal	normal	.	.
FRAG001219	PL001219	normal	normal	normal	normal	normal	.	.
FRAG001220	PL001220	normal	normal	normal	normal	normal	.	.
FRAG001221	PL001221	normal	normal	normal	normal	normal	.	.
FRAG001222	PL001222	normal	normal	normal	normal	normal	.	.
FRAG001223	PL001223	normal	normal	normal	normal	normal	.	.
FRAG001224	PL001224	normal	normal	normal	normal	normal	.	.
FRAG001225	PL001225	normal	normal	normal	normal	normal	.	.
FRAG001226	PL001226	normal	normal	normal	normal	normal	.	.
FRAG001227	PL001227	normal	normal	normal	normal	normal	.	.
FRAG001228	PL001228	normal	normal	normal	normal	normal	.	.
FRAG001229	PL001229	normal	normal	normal	normal	normal	.	.
FRAG001230	PL001230	normal	normal	normal	normal	normal	.	.
FRAG001231	PL001231	normal	normal	normal	normal	normal	.	.
FRAG001232	PL001232	normal	normal	normal	normal	normal	.	.
FRAG001233	PL001233	normal	normal	normal	normal	normal	.	.
FRAG001234	PL001234	normal	normal	normal	normal	normal	.	.
FRAG001235	PL001235	normal	normal	normal	normal	normal	.	.
FRAG001236	PL001236	normal	normal	normal	normal	normal	.	.
FRAG001237	PL001237	normal	normal	normal	normal	normal	.	.
FRAG001238	PL001238	normal	normal	normal	normal	normal	.	.
FRAG001239	PL001239	normal	normal	normal	normal	normal	.	.
FRAG001240	PL001240	normal	normal	plus	normal	normal	1	Chr3
FRAG001241	PL001241	normal	normal	normal	normal	normal	.	.
FRAG001242	PL001242	normal	normal	normal	normal	normal	.	.
FRAG001243	PL001243	normal	normal	normal	normal	normal	.	.
FRAG001244	PL001244	normal	normal	normal	normal	normal	.	.
FRAG001245	PL001245	normal	normal	normal	normal	normal	.	.
FRAG001246	PL001246	normal	normal	normal	normal	normal	.	.
FRAG001247	PL001247	normal	normal	normal	normal	normal	.	.
FRAG001248	PL001248	normal	normal	normal	normal	normal	.	.
FRAG001249	PL001249	normal	normal	normal	normal	normal	.	.
FRAG001250	PL001250	normal	normal	normal	normal	normal	.	.
FRAG001251	PL001251	normal	normal	normal	normal	normal	.	.
FRAG001252	PL001252	normal	normal	normal	normal	normal	.	.
FRAG001253	PL001253	normal	normal	normal	normal	normal	.	.
FRAG001254	PL001254	normal	normal	normal	normal	normal	.	.
FRAG001255	PL001255	normal	normal	normal	normal	normal	.	.
