# Supplementary material for: Catastrophic chromosomal restructuring during genome elimination in plants
Source: eLife. 2015 May 15;4:e06516. doi: 10.7554/eLife.06516 (PMC4461816; doi:10.7554/eLife.06516)
Supplement: Supplementary file 4. — Breakpoint junctions from FRAG00062. The positions and types of repair for each breakpoint junction are indicated, along with their orientation as well as possible outcomes for a novel gene product. DOI: http://dx.doi.org/10.7554/eLife.06516.023 [file elife-06516-supp4.xls]

## Sheet: Sheet1
Junction	Junction _Type	Intervening_Sequence	Coordinates_L	+/- to ref	Coordinates_R	+/- to ref	Direction	Gene_1	Gene_2	Novel product	Type
01a2_07c1	2bp homology	GA	Chr1:204604..205575	+	Chr1:9637421..9637719	+	head to tail	AT1G01570	AT1G27690	Yes	exon to exon
01b1_22b1	1bp homology	C	Chr4:16576064..16576256	+	Chr1:31632..32624	+	head to tail	AT1G01050	AT4G34740	Yes	intron to exon
01b2_23b2	2bp homology	AT	Chr1:86551..87466	+	Chr4:18445706..18445402	-	tail to tail	AT1G01200	-	no	intron, missing start
02a2_13b2	blunt with 54bp insert	CATGAATTATAATTATCTATTATCACATTGTTGGCCCAATGTGCACAAGCAGAT	Chr1:3659415..3658407	-	Chr1:18415689..18415415	-	head to tail	AT1G10940	-	Yes	5'UTR to something
02b2_15b1	blunt with 20bp insert	TTGAATAAGACTTTCTCTAT	Chr1:20948782..20948420	-	Chr1:572417..571683	-	head to tail	AT1G56010	AT1G02660	Yes	intron to exon
02c1_12b2 (chunk of Chr1:5947755..5947728 in between)	3bp homology	CTT, CGCCATTCT	Chr1:16639404..16639586	+	Chr1:3312402..3313353	+	head to tail	AT1G43886	AT1G10130	Yes	exon to exon
02c2_05a1	2bp homology	AG	Chr1:3383144..3384094	+	Chr1:6328837..6329163	+	head to tail	-	AT1G18390	no	exon, missing start
02d1_15a2	blunt with 109bp insert	ACGACATTAACTTACCTAGACGACATATTATTGTTAGTTTTCACAACAAAGTAAAACCGGTAGAATCTTACCAAGTAATAACATTTAACCTCGAGAGACGAGCTCGTGT	Chr1:21319460..21319621	+	Chr1:3406163..3407141	+	head to tail	AT1G57565	-	Yes	promoter to something
02d2_07b2	5bp homology	CATTT	Chr1:3486411..3487339	+	Chr1:8252724..8252354	-	tail to tail	-	AT1G23240	no	3'UTR to something
03a1_07a1	2bp homology	AC	Chr1:7777153..7776876	-	Chr1:4105850..4106860	+	head to head	AT1G22060	AT1G12110	no	exon to exon, missing start
03a2_05a2	blunt with 3bp insert	CAT	Chr1:6827693..6827978	+	Chr1:5947163..5946187	-	tail to tail	AT1G19750	AT1G17360	Yes	intron to intron
03b2_10a2	1bp homology	A	Chr1:4806781..4807664	+	Chr1:11600776..11600447	-	tail to tail	-	-	no	-
03c1_09a2	blunt with 23bp insert	TTAAGGATCAATTTTCAGGGCAA	Chr1:11414454..11414643	+	Chr1:5309646..5310652	+	head to tail	-	-	no	-
03c2_23a1	blunt with 9bp insert	AGGCATCAT	Chr1:5309311..5310181	+	Chr4:17202844..17203147	+	head to tail	AT1G15460	-	no	3' UTR to something
04a1_15b2	blunt with 15bp insert	TATGCCTCAGGTTCT	Chr1:21019436..21019757	+	Chr1:6268645..6269610	+	head to tail	-	AT1G18210	Yes	exon to something
04a2_09c1	blunt with 26 bp insert	GTTTTCTAGTAGATAGAACAATAAAA	Chr1:6323355..6324389	+	Chr1:11357649..11357959	+	head to tail	-	-	no	-
06a1_18b1	blunt no insert		Chr1:24966539..24966116	-	Chr1:6832402..6833338	+	head to head	AT1G66920	AT1G19770	no	exon to exon, missing start
06a2_18a2	blunt with 50bp insert	CTCGTATGTGATCATTATTGAGAACTGTTTATTTTGCTTCTCTTTGTGAC	Chr1:7572688..7573662	+	Chr1:24962860..24962588	-	tail to tail	AT1G21600	AT1G66910	no	exon to intron, missing start
07a2_09b1	blunt with 3bp insert	AAG	Chr1:11353568..11353809	+	Chr1:10379014..10378124	-	tail to tail	AT1G31710	-	Yes	exon to something
07c2_07d2	9bp homology	TATTTTCTA	Chr1:9676294..9676476	+	Chr1:9691258..9691589	+	head to tail	-	-	no	-
08a2_15c2	7bp homology	GGTAAAA	Chr1:20955644..20955324	-	Chr1:10912922..10911983	-	head to tail	-	-	no	-
09a1_10b1	blunt with 4bp insert	ACAA	Chr1:11196255..11195311	-	Chr1:11470400..11470671	+	head to head	AT1G31300	AT1G31940	Yes	exon to exon
09c2_11a1	1bp homology	G	Chr1:11601988..11601794	-	Chr1:11401610..11400661	-	head to tail	AT1G31810	AT1G32200	Yes	exon to 3'UTR
10a1_14a1	blunt with 1bp insert	T	Chr1:11417761..11416812	-	Chr1:19721807..19721990	+	head to head	AT1G31820	AT1G52940	Yes	exon to intron
12a2_13a2	blunt with 51bp insert	AGAACATCCCATTCTACATCCCATTCTATAGTTCTTTACATATGTCAAAAC	Chr1:18421440..18421716	+	Chr1:16916018..16915048	-	tail to tail	-	AT1G44800	Yes	intron to something
13a1_13b1	2bp homology	AA	Chr1:18361086..18360720	-	Chr1:18283875..18284846	+	head to head	AT1G49400	-	no	exon to something, missing start
14a2_16a1	1bp homology	C	Chr1:21963558..21963159	-	Chr1:19867766..19866950	-	head to tail	-	-	no	-
15a1_20c2	1bp homology	G	Chr1:26828860..26829166	+	Chr1:20378772..20379757	+	head to tail	AT1G54560	AT1G71160	Yes	intron to exon
16a2_17a1	blunt with 38bp insert	ATTGGATTCATTGTGGTTTAGGTTAGAGTACGCCTGGC	Chr1:22016137..22017156	+	Chr1:22027169..22027493	+	head to tail	AT1G59820	AT1G59840	Yes	intron to exon
17a2_15c1	blunt with 5bp insert	TTTTT	Chr1:20951527..20951791	+	Chr1:22085046..22084214	-	tail to tail	-	-	no	-
19a2_23b1 (chunk of Chr1:26571342..26571587 in between)	3bp homology	AGT, CTTGTG	Chr1:25803162..25804051	+	Chr4:18442706..18442786	+	head to tail	-	AT4G39756	no	something to exon, missing start
20a2_20b2	1bp homology	T	Chr1:27649812..27650163	+	Chr1:26754558..26754281	-	tail to tail	AT1G73560	AT1G70950	Yes	exon to exon
20c1_20b1	blunt with 35bp insert	TTCTTATTTGAGATGTCGATTTTTGTGTGTGTGTG	Chr1:26794892..26794626	-	Chr1:26700652..26701686	+	head to head	-	AT1G70790	no	something to intron, missing start
20d2_18c2	blunt with 175bp insert	CCTGACGTTTTGAAGAACTGTTTATATTGTTTGGGTTTTACCAAAAACGATAATATATATATTTGAGAACCTTAAGCACAAGATCCGTGGATCATATAGTCTTTAGAAAATCTCGGAGTTGGAACTCCAAAACCACGAGATTTTGCCATTGACTAATCCAAAACTGTTTGATCTT	Chr1:27321397.. 27321558	+	Chr1:25018114..25017919	-	tail to tail	AT1G67035	AT1G72550	Yes	exon to intron
21a2_22a2	blunt with 3bp insert	ACA	Chr4:16942317..16942527	+	Chr1:27688298..27687405	+	head to tail	AT4G35760	AT1G73650	no	3'UTR to 3'UTR
22b2_12a1	blunt with 37bp insert	ATAAGCCATCAGACTACGGCAAGCTCAAACTAACAAC	Chr1:16577460..16576873	-	Chr1:13241418..13241478	+	head to head	-	-	no	-
02a1_19a1	blunt with 20bp insert	GAGATATTATATATCACGGA	Chr1:458794..458539	-	Chr1:24965026..24965265	+	head to head	AT1G02310	-	no	exon to something, missing start
03b2_10b2	blunt with 42bp insert	ATATAGTATAATATTAAATGTCGACGCGTATAATATTAACTC	Chr1:11472403..11473050	+	Chr1:4683878..4684101	+	head to tail	-	AT1G13660	no	exon to something, missing start
