# Supplementary material for: Catastrophic chromosomal restructuring during genome elimination in plants
Source: eLife. 2015 May 15;4:e06516. doi: 10.7554/eLife.06516 (PMC4461816; doi:10.7554/eLife.06516)
Supplement: Supplementary file 5. — Enrichment ratios of genomic features surrounding breakpoints from duplicated or triplicated blocks. The ratios of genomic features listed in column 1 are calculated using 1000 bp and 10,000 bp windows surrounding breakpoints from duplicated or triplicated blocks. Regions with enriched ratios has a value of > 1 while regions that are under-represented have values of < 1. Light orange boxes are indicated for p < 0.05 and light red boxes for p < 0.01. DOI: http://dx.doi.org/10.7554/eLife.06516.024 [file elife-06516-supp5.xls]

## Sheet: Sheet1
			Duplicated Breakpoints						Triplicated Breakpoints
			1,000 bp			10,000 bp			1,000 bp			10,000 bp
	Genomic Feature		Ratio	p-value		Ratio	p-value		Ratio	p-value		Ratio	p-value
	DNA_replication_origin		0	0.105		0.21	0.029		1.82	0.152		2.32	0.017
	DNaseI hypersensitive site		1.34	0.069		1.13	0.13		1.45	0.039		1.04	0.368
	gene		1.32	0.003		1.19	0.007		1.04	0.353		1.13	0.053
	open_chromatin_state_1		1.55	0.064		1.24	0.048		1.05	0.424		0.89	0.232
	open_chromatin_state_2		1.76	0.02		1.1	0.27		2.25	0.003		1.58	0
	open_chromatin_state_3		1.43	0.143		1.31	0.049		0.85	0.362		1.16	0.182
	open_chromatin_state_4		0.68	0.145		1.09	0.271		1.15	0.302		0.98	0.475
	open_chromatin_state_5		0.57	0.103		0.83	0.222		0.87	0.356		1.14	0.227
	open_chromatin_state_6		1.43	0.141		1.17	0.202		0.71	0.216		0.98	0.49
	open_chromatin_state_7		0.73	0.246		1.26	0.144		0.8	0.327		1.06	0.437
	open_chromatin_state_8		0.97	0.504		0.82	0.301		0.82	0.354		0.62	0.091
	open_chromatin_state_9		0	0.008		0.01	0		0.37	0.079		0.39	0.046
	pseudogene		0	0.522		1.47	0.226		0	0.476		0.24	0.1
	satellite		0.58	0.046		0.67	0.009		0.88	0.407		0.76	0.106
	transposable_element		0.32	0.005		0.56	0.009		0.82	0.271		0.64	0.041
