# Supplementary material for: Catastrophic chromosomal restructuring during genome elimination in plants
Source: eLife. 2015 May 15;4:e06516. doi: 10.7554/eLife.06516 (PMC4461816; doi:10.7554/eLife.06516)
Supplement: Supplementary file 7. — BAC clones used for chromosome painting. Listing of the corresponding chromosome, BAC clone and associated GenBank accession used. DOI: http://dx.doi.org/10.7554/eLife.06516.026 [file elife-06516-supp7.xls]

## Sheet: List1
Arabidopsis thaliana chromosome	Genomic block	BAC clone	GenBank Accession
AT1	A	T25K16	AC007323
AT1	A	F6F3	AC023628
AT1	A	F22L4	AC061957
AT1	A	T1N6	AC009273
AT1	A	T6A9	AC064879
AT1	A	F10O3	AC006550
AT1	A	F21M11	AC003027
AT1	A	T1G11	AT1G11000
AT1	A	T25N20	AC005106
AT1	A	T21E18	AC024174
AT1	A	F12K11	AC007592
AT1	A	F22G5	AC022464
AT1	A	T23G18	AC011438
AT1	A	F7G19	AC000106
AT1	A	F14J9	AC003970
AT1	A	F14N23	AC005489
AT1	A	T16B5	AC007354
AT1	A	T19D16	U95973
AT1	A	T23J18	AC011661
AT1	A	F12F1	AC002131
AT1	A	T28K15	AC022522
AT1	A	T12C24	AC025417
AT1	A	F13K23	AC012187
AT1	A	F13B4	AC027134
AT1	A	F7A19	AC007576
AT1	A	F10B6	AC006917
AT1	A	T16N11	AC006917
AT1	A	F3O9	AC006341
AT1	A	F17F16	AC026237
AT1	A	F20D23	AC007651
AT1	A	F1L3	AC022492
AT1	A	T10F20	AC034107
AT1	A	F25I16	AC026238
AT1	A	T29M8	AC069143
AT1	B	F6F9	AC007797
AT1	B	F5M15	AC027665
AT1	B	T22I11	AC012190
AT1	B	F8K7	AC007727
AT1	B	F16L1	AC073942
AT1	B	T22J18	AC003979
AT1	B	F26F24	AC005292
AT1	B	T23E23	AC002423
AT1	B	F3I6	AC002396
AT1	B	F5A9	AC004133
AT1	B	T1K7	AC013427
AT1	B	T24P13	AC006535
AT1	B	F17L21	AC004557
AT1	B	F28L5	AC079280
AT1	B	F3M18	AC010155
AT1	B	F15D2	AC068667
AT1	B	T3M22	AC079288
AT1	B	T1P2	AC022455
AT1	B	T4K22	AC025295
AT1	B	T17H7	AC004135
AT1	B	T19E23	AC007654
AT1	B	F27M3	AC074360
AT1	B	F3C3	AC084165
AT1	B	F5D14	AC007767
AT1	B	F6N18	AC017118
AT1	B	T9L6	AC021045
AT1	B	T1E4	AC069299
AT1	B	T3M13	AC022288
AT1	B	F23M19	AC007454
AT1	B	F12K21	AC023279
AT1	C	T7O23	AC074228
AT1	C	T18F15	AC084807
AT1	C	T12C22	AC020576
AT1	C	T2P3	B21868
AT1	C	T3F24	AC015449
AT1	C	T6B12	AC079679
AT1	C	T2J15	AC051631
AT1	C	F21D18	AC023673
AT1	C	F11A17	AC007932
AT1	C	T1N15	AC020889
AT1	C	F9P7	AC074308
AT1	C	F11I4	AC073555
AT1	C	T24P22	AC084242
AT1	C	F27K7	AC084414
AT1	C	F27J15	AC016041
AT1	C	F13F21	AC007504
AT1	C	F14J22	AC011807
AT1	C	T18C15	AC074110
AT1	C	F11F12	AC012561
AT1	C	F8A12	AC079284
AT1	C	F5D21	AC024261
AT1	C	T14L22	AC015448
AT1	C	F9I5	AC022354
AT1	C	F6D8	AC008016
AT1	C	F14G24	AC019018
AT1	C	F8L10	AC022520
AT1	C	F12M16	AC008007
AT1	C	T3F20	AC018748
AT1	C	F15I1	AC006577
AT1	C	F20D21	AC005287
AT1	C	T22H22	AC005388
AT1	C	F14C21	AC069144
AT1	C	T18I3	AC079287
AT1	C	T5A14	AC005223
AT1	C	F20N2	AC002328
AT1	C	T6H22	AC009894
AT1	D	F13N6	AC058785
AT1	D	F12K22	AC079732
AT1	D	F13D13	AC079991
AT1	D	T15M6	AC079604
AT1	D	T18I24	AC079131
AT1	D	F16M22	AC073943
AT1	D	F19C14	AC008051
AT1	D	F9K23	AC082643
AT1	D	F20B16	B10348
AT1	D	T30E16	AC009317
AT1	D	F23H11	AC007258
AT1	D	T13D8	AC004473
AT1	D	T7P1	AC018908
AT1	D	T25B24	AC005850
AT1	D	F19K23	AC000375
AT1	D	T3P18	AC005698
AT1	D	F9N12	AC022355
AT1	D	F24D7	AC011622
AT1	D	T12P18	AC010852
AT1	E	T23K8	AC007230
AT1	E	F1E22	AC007234
AT1	E	F12P19	AC009513
AT1	E	T6J19	AC066691
AT1	E	T27F4	AF325124
AT1	E	T12I7	AC079285
AT1	E	T4O24	AC083891
AT1	E	F1O19	AC007152
AT1	E	F1N21	AC002130
AT1	E	T1F15	AC004393
AT1	E	F12A21	AC008113
AT1	E	T23K23	AC012563
AT1	E	T2E12	AC015986
AT1	E	T26J14	AC011915
AT1	E	T6L1	AC011665
AT1	E	F4N2	AC008262
AT1	E	F10D13	AC073178
AT1	E	T6C23	AC013289
AT1	E	T17F3	AC010675
AT1	E	F17O7	AC003671
AT1	E	F24J13	AC010796
AT1	E	F5A18	AC011663
AT1	E	F14O23	AC012654
AT1	E	F17M19	AC021665
AT1	E	T9N14	AC067754
At4	U	T12J5	AL035522
At4	U	F8D20	AL031135
At4	U	F4B14	AL031986
At4	U	T19K4	AL022373
At4	U	F23E13	AL022141
At4	U	T28I19	AL035709
At4	U	F22I13	AL035539
At4	U	F19H22	AL035679
At4	U	T19P19	AL022605
At4	U	T5J17	AL035708
