# Supplementary material for: Catastrophic chromosomal restructuring during genome elimination in plants
Source: eLife. 2015 May 15;4:e06516. doi: 10.7554/eLife.06516 (PMC4461816; doi:10.7554/eLife.06516)
Supplement: Supplementary file 8. — Oligonucleotides sequences for analysis of breakpoint junctions from FRAG00062. DOI: http://dx.doi.org/10.7554/eLife.06516.027 [file elife-06516-supp8.xls]

## Sheet: Sheet1
Name	Sequence 5' to 3'
01a2_07c1 Fwd	CTCTGAAACCCTCCCCCAGT
01a2_07c1 Rev	CTCTGAAGCCATCGTCGTGA
01b1_22b1 Fwd	CCAATGGCTATGTCTCCTGGT
01b1_22b1 Rev	GGAAGCAAGGTCAAATACGAGC
01b2_23b2 Fwd	TTCTCGAAACAACAACGCGG
01b2_23b2 Rev	TGTCAGAGAGGATGGCTCAAG
02c2_05a1 Fwd	CGGAAGAAATCAAGCACGGG
02c2_05a1 Rev	TTAACGGCTACGCTTCGTCC
02d1_15a2 Fwd	TTTAACCTCGAGAGACGAGC
02d1_15a2 Rev	GGTTCGGTATCACGGTGTGT
02d2_07b2 Fwd	CAAGAAGGCTAGTGCGCTGA
02d2_07b2 Rev	TGCGTAGACGCATTCCTCATTA
03a2_05a2 Fwd	CAGGCTACCACATGACAAATTC
03a2_05a2 Rev	AAGATTGCCCCCGTTGCTAA
03b2_10a2 Fwd	CCGCCGCATAAAGGTCCAAT
03b2_10a2 Rev	TTTGTGGATATCGAGCCGTGA
03c1_09a2 Fwd	AGGGCAATTGAACCCGACG
03c1_09a2 Rev	CCAAGAAGGCGATGCTGAGA
04a2_09c1 Fwd	TTGAGCTTCCACCTGGTGTT
04a2_09c1 Rev	TTGTTCTATCTACTAGAAAACCCGT
06a1_18b1 Fwd	ACGAATTTATATCTCCGACAATCAG
06a1_18b1 Rev	AGGCTCACCACCGAATGAAG
04a1_15b2 Fwd	ATGCCTCAGGTTCTCACACC
04a1_15b2 Rev	ACCGCGTAAAAGGAGTGTGT
